# Supplementary material
Source: publisher site journal article supplement (https://www.dovepress.com/article/623929)
Supplement: Supplementary file 1 [file 623929_Supplemmentary%20File%201.docx]

**Supplementary File 1**

**Guideline-Concordant Low Back Pain Vignette (GCLBP-V)**

**Instructions**

**Please read the following clinical scenario carefully and indicate the single best recommendation you would usually provide for this patient in each domain below.**

**Case Vignette**

*A 45-year-old warehouse employee presents with a five-week history of low back pain that developed gradually without a clear mechanism of injury. The pain is localized to the lumbar region with occasional radiation to the left buttock. She describes the discomfort as fairly constant, averaging 5/10 in intensity over the past week. Symptoms are aggravated by prolonged standing or walking for more than 10–15 minutes and are alleviated by postural changes or gentle stretching. She has been using over-the-counter analgesics intermittently and is concerned about the pain's persistence.*

*Her warehouse job involves inventory management, computer work, and stock lifting. Since the pain began, she has reduced her hours and avoids heavier tasks due to fear of worsening her condition. She reports moderate disability, including difficulty bending, rising from a chair, and increased fatigue.*

*Physical examination reveals moderately limited spinal flexion and extension due to pain, with mild paraspinal tenderness. Straight leg raise is negative bilaterally and neurological examination is normal. No red-flag indicators are present, and her general health is otherwise good. She has a history of two previous, self-resolving episodes of low back pain over several years.*

**1. Daily Activities**

1. Continue usual daily activities as tolerated and gradually resume normal routines
2. Reduce physically demanding daily activities until symptoms improve substantially
3. Avoid bending, lifting, and stair climbing for several weeks to protect the spine
4. Limit most household and community activities until pain becomes minimal

**2. Work**

A. Remain at or return to work with temporary modifications such as lighter duties or scheduled breaks

B. Reduce work demands significantly and avoid manual tasks until symptoms are consistently mild

C. Take temporary sick leave and gradually resume work once pain improves further

D. Delay return to full work duties until additional investigations exclude structural injury

**3. Exercise**

A. Avoid structured exercise during the painful phase and focus on symptom reduction first

B. Begin gentle flexibility and stabilization exercises once pain intensity decreases

C. Participate in low-intensity stretching and walking only until movement becomes more comfortable

D. Begin a graded exercise program tailored to tolerance and progressively increase activity levels

**4. Bed Rest**

A. Use bed rest for several days to reduce irritation before gradually increasing activity

B. Limit activity substantially and rest frequently throughout the day until symptoms settle

C. Avoid prescribing bed rest except for brief rest during severe flare-ups, followed by return to activity

D. Remain mostly at rest until symptoms improve enough to tolerate daily activities comfortably

**Scoring**

Each domain is scored as follows:

- 1 = guideline-concordant response
- 0 = non-concordant response

Total score = sum of all four items (range 0–4).

Higher scores indicate greater alignment with guideline-concordant recommendations for non-specific low back pain.

**Answer Key**

- Daily activities: A
- Work: A
- Exercise: D
- Bed rest: C

**Missing Data Rule**

If one or more items are unanswered, the total score is treated as missing and no partial score is calculated.

**Abbreviations**

GCLBP-V = Guideline-Concordant Low Back Pain Vignette
